# Supplementary material for: In Vivo Evaluation of Bone Regenerative Capacity of the Novel Nanobiomaterial: β-Tricalcium Phosphate Polylactic Acid-co-Glycolide (β-TCP/PLLA/PGA) for Use in Maxillofacial Bone Defects
Source: MDPI journal article supplement (doi:10.3390/nano14010091), 2023-12-28
Supplement: s1 [file s1]

Supplemental figures

$\beta$ -TCP/PLLA/PGA

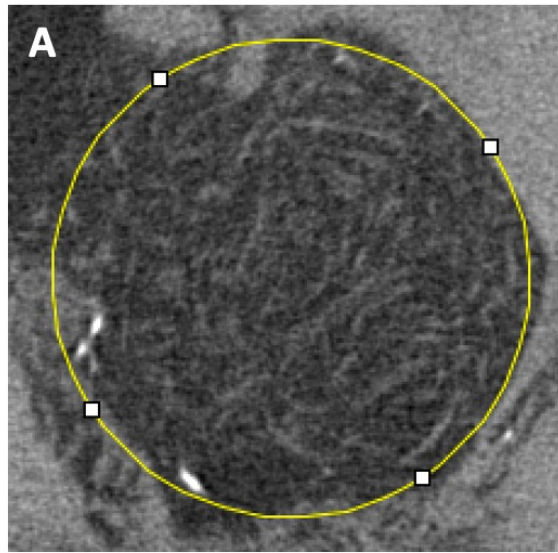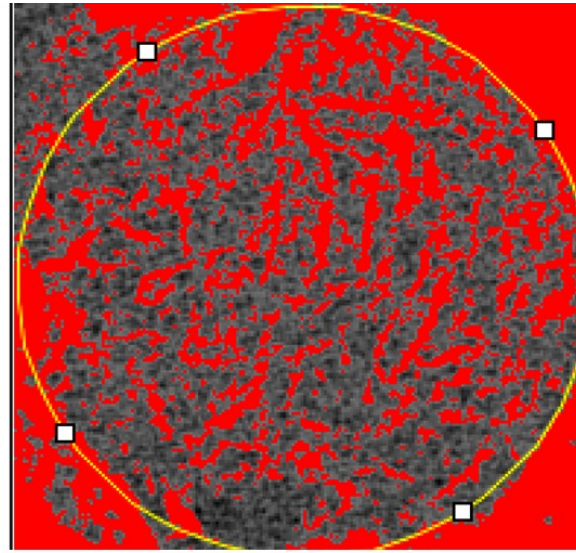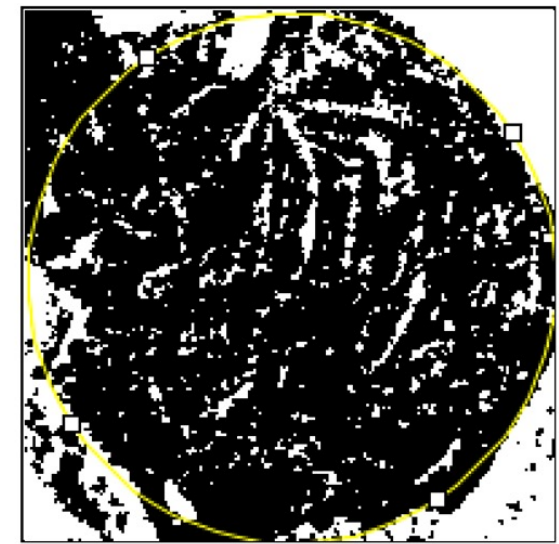

$\beta$ -TCP

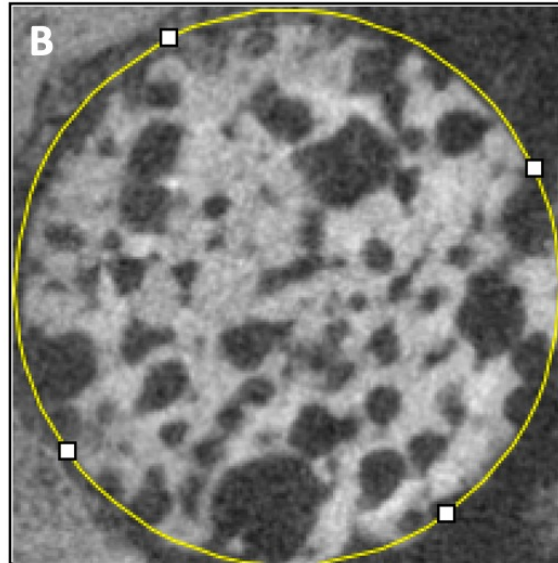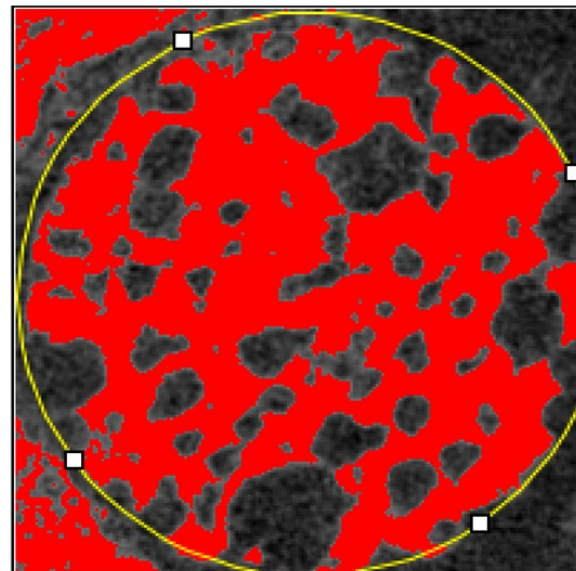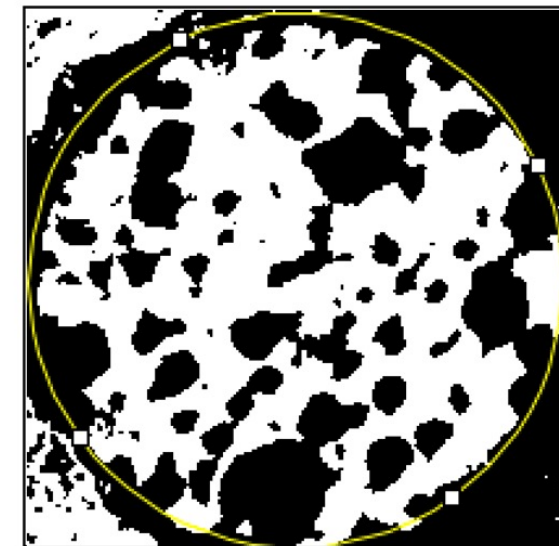

**S1** - Redefining 4-mm critical size defect and Binary images of A:  $\beta$ -TCP/PLLA/PGA and B:  $\beta$ -TCP used for BV/TV calculation using ImageJ.



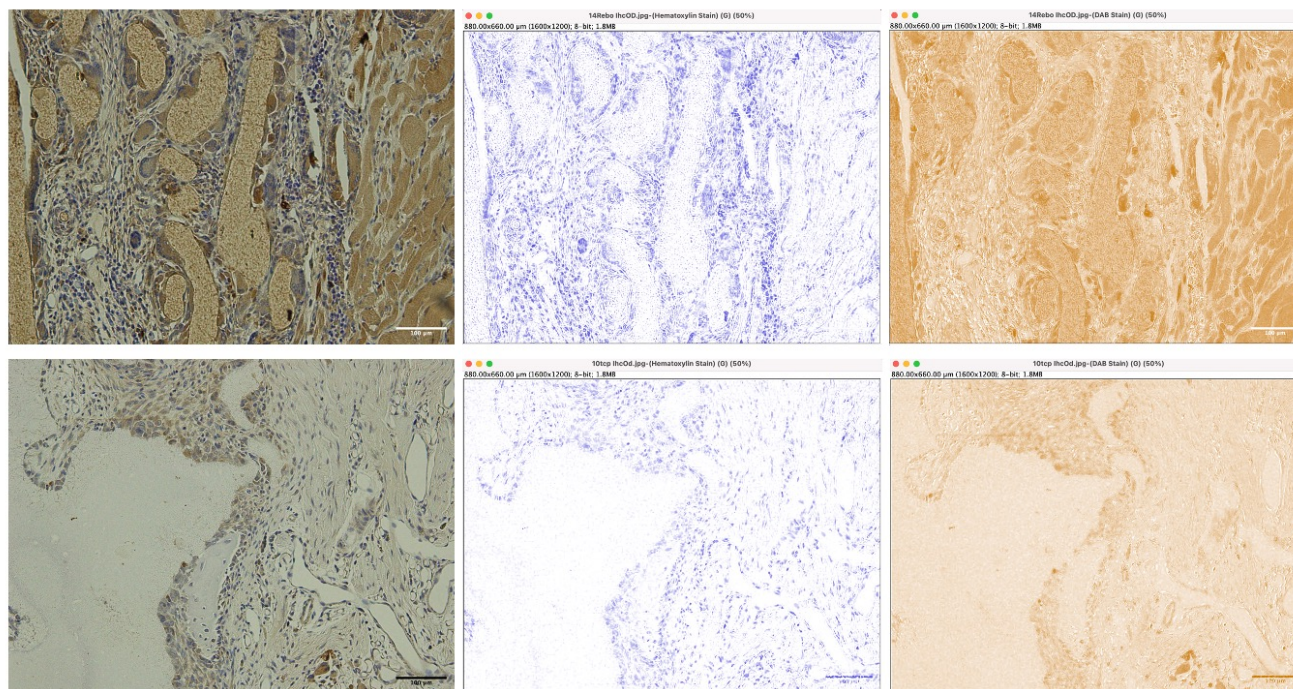

**Color Deconvolution (G)**  
 192.50x35.75  $\mu\text{m}$  (350x65); RGB; 89K

**Colour deconvolution: H DAB**

|          |                                          |
|----------|------------------------------------------|
| Colour_1 | R:0.68892235, G:0.70100874, B:0.18431695 |
| Colour_2 | R:0.2457366, G:0.4914732, B:0.8355044    |
| Colour_3 | R:0.6819087, G:0.51676, B:0.51764816     |

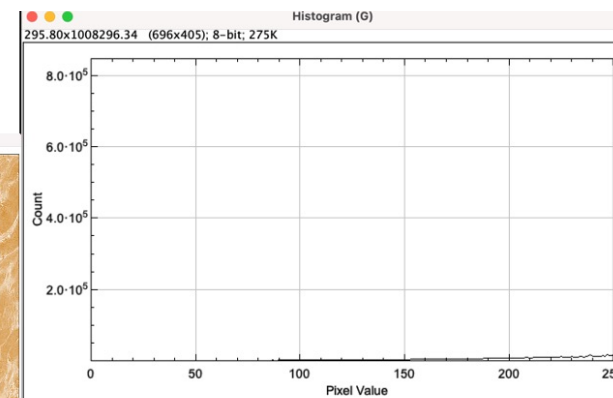

**Log**

Pixel Count: 1920000  
 Percentage contribution of High Positive: 2.4517  
 Percentage contribution of Positive: 10.2206  
 Percentage contribution of Low Positive: 27.9558  
 Percentage contribution of Negative: 59.372

The score is Low Positive

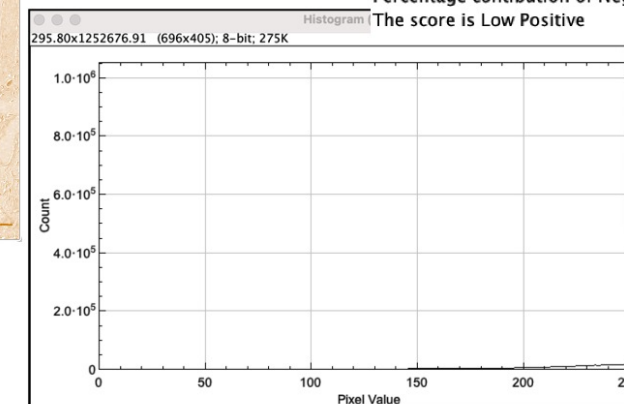

**Log**

Pixel Count: 1920000  
 Percentage contribution of High Positive: 1.6695  
 Percentage contribution of Positive: 6.1845  
 Percentage contribution of Low Positive: 19.5519  
 Percentage contribution of Negative: 72.5941

The score is Negative

**S2** - Method employed for IHC OD evaluation using ImageJ.  $\beta$ -TCP/PLLA/PGA (upper left to right) and  $\beta$ -TCP (lower left to right). Log displaying the score of the example image.
